## Pulmonary arterial hypertension in Spanish pediatric registry age: clinical characterization, management and survival

J. Playan Escribano<sup>1</sup>, T. Segura De La Cal<sup>2</sup>, P. Escribano Subias<sup>2</sup>, C. Labrandero<sup>3</sup>, A. Rodriguez Ogando<sup>4</sup>, A. Moreno Galdo<sup>5</sup>, M. Lozano Balseiro<sup>6</sup>, A. Moya Bonora<sup>7</sup>, E. Gomez Guzman<sup>8</sup>, J.M. Espin Lopez<sup>9</sup>, F. Perin<sup>10</sup>, B. Plata Izquierdo<sup>11</sup>, M.T. Viadero Ubierna<sup>12</sup>, M. Zapata Sanchez<sup>13</sup>, M.J. Del Cerro Marin<sup>14</sup>

<sup>1</sup>Hospital Clinico San Carlos, Madrid, Spain; <sup>2</sup>University Hospital 12 de Octubre, Madrid, Spain; <sup>3</sup>University Hospital La Paz, Madrid, Spain; <sup>4</sup>University Hospital Gregorio Maranon, Madrid, Spain; <sup>5</sup>University Hospital Vall d'Hebron, Barcelona, Spain; <sup>6</sup>Teresa Herrera Hospital, A Coruña, Spain; <sup>7</sup>Hospital Universitario y Politecnico La Fe, Valencia, Spain; <sup>8</sup>University Hospital Reina Sofia, Cordoba, Spain; <sup>9</sup>University Hospital Virgen de la Arrixaca, El Palmar, Spain; <sup>10</sup>University Hospital Virgen de las Nieves, Granada, Spain; <sup>11</sup>Complejo Asistencial Universitario de Salamanca, Salamanca, Spain; <sup>12</sup>University Hospital Marques de Valdecilla, Santander, Spain; <sup>13</sup>Clinica Cardio VID, Medellin, Colombia; <sup>14</sup>University Hospital Ramon y Cajal de Madrid, Madrid, Spain

On behalf of REHIPED investigators

**Funding Acknowledgement:** Type of funding source: Private grant(s) and/or Sponsorship. Main funding source(s): Janssen, Ferrer

**Background:** Pulmonary arterial hypertension (PAH) includes idiopathic PAH and congenital heart disease (CHD) related PAH. A wide variety of CHD can develop PAH, but their clinical characteristics define four large groups: Eisenmenger, PAH associated with non-restrictive shunt, severe PAH associated with restrictive shunt and postoperative PAH. Our aim was to study the clinical and prognostic differences between these groups and idiopathic PAH.

**Methods:** The REHIPED registry is a Spanish, multicenter, observational and prospective registry on pulmonary hypertension in the pediatric population (<18 years of age) that began in 2008. 183 patients were analyzed: baseline characteristics, functional class, right catheterization data, treatment and survival were compared

**Results:** 183 patients were analyzed, characteristics are detailed in the table. In patients with idiopathic PAH, treatment with prostanoids was more frequently used as first line therapy and during follow up. The average follow-up time was 9 years. There was not a statistically significant difference in survival among the 4 clinical groups of CHD related PAH. There was a borderline significant difference (logrank p 0.05) in survival between the group of CHD related PAH and idiopathic PAH.

**Conclusion:** Idiopathic PAH patients have worse outcome than CHD related PAH patients although they have less comorbidities, less severe hemodynamics and are treated more aggressively.

|                                                                     | Total     | Eisenmenger | Non restrictive shunts | Restrictive shunts | Postoperative PAH | Idiopathic PAH | p      |
|---------------------------------------------------------------------|-----------|-------------|------------------------|--------------------|-------------------|----------------|--------|
| N, n (%)                                                            | 146       | 31 (16)     | 38 (20)                | 8 (4)              | 67 (35)           | 47 (25)        |        |
| Sex (female), n (%)                                                 | 81 (56)   | 17 (55)     | 26 (68)                | 4 (50)             | 34 (51)           | 23 (49)        | 0.714  |
| Age, mean ± SD                                                      | 4.8±4.7   | 8.9±4.6     | 3.2±4.3                | 2.4±4.1            | 4.5±4.7           | 4.5±3.6        | <0.001 |
| WHO Functional class III–IV, n (%)                                  | 64 (43.8) | 15 (48)     | 15 (39)                | 2 (25)             | 34 (51)           | 17 (36)        | 0.389  |
| Chromosomopathy, n (%)                                              | 62 (32.5) | 15 (48)     | 13 (34)                | 2 (25)             | 30 (44.8)         | 2 (4.3)        | <0.001 |
| Mean pulmonary arterial pressure (mmHg), mean ± SD                  | 45.5±17.6 | 62.1±17.3   | 39.8±12.7              | 40±18              | 42±18             | 47.3±16.3      | <0.001 |
| Pulmonary vascular resistance index (uW·m <sup>2</sup> ), mean ± SD | 9.9±8.4   | 15.4±9.7    | 5.2±3                  | 8.5±6              | 8.9±8.9           | 12±8.3         | <0.001 |
| Initial therapy                                                     |           |             |                        |                    |                   |                | 0.005  |
| Oral monotherapy, n (%)                                             | 146 (83)  | 29 (97)     | 30 (91)                | 4 (57)             | 52 (88)           | 31 (67)        |        |
| Monotherapy with prostanoids, n (%)                                 | 7 (5)     | 0           | 1 (3)                  | 2 (29)             | 0                 | 5 (11)         |        |
| Oral combination therapy, n (%)                                     | 14 (10.2) | 1 (3.3)     | 2 (6)                  | 1 (14)             | 6 (10)            | 6 (13)         |        |
| Combination therapy with prostanoids, n (%)                         | 5 (4)     | 0           | 0                      | 0                  | 1 (2)             | 4 (9)          |        |
| Prostanoids during follow up, n (%)                                 | 52 (27)   | 4 (13)      | 5 (13)                 | 3 (38)             | 13 (19)           | 27 (57)        | <0.001 |

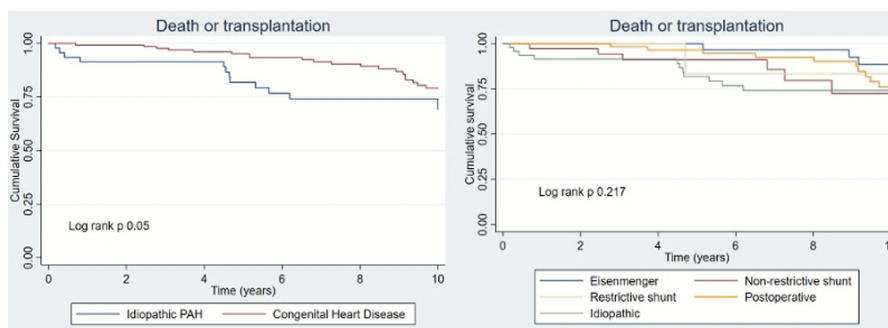

Source: http://academic.oup.com/eurheartj/article-pdf/41/Supplement_2/ehaa946.2225/34521086/ehaa946.2225.pdf
